# Supplementary material for: The influence of alkyl chain branching on the properties of pyrrolidinium-based ionic electrolytes
Source: Royal Society of Chemistry journal article supplement (doi:10.1039/d0cp03046e), 2020-01-01
Supplement: d0cp03046e3.pdf [file d0cp03046e3.pdf]

## The influence of alkyl chain branching on the properties of pyrrolidinium-based ionic electrolytes

Danah Al-Masri,<sup>a†</sup> Ruhamah Yunis,<sup>a†</sup> Anthony F. Hollenkamp,<sup>b</sup> Cara M. Doherty<sup>b,c</sup> and Jennifer M. Pringle<sup>a\*</sup>

<sup>a</sup>Institute for Frontier Materials, Deakin University, Melbourne, Victoria 3125, Australia. E-mail: [\\*jenny.pringle@deakin.edu.au](mailto:jenny.pringle@deakin.edu.au).

<sup>†</sup> Co-first author

<sup>b</sup>Commonwealth Scientific and Industrial Research Organisation (CSIRO), Energy, Clayton, 3168, VIC, Australia.

<sup>c</sup>School of Chemistry, Monash University, Wellington Road, Clayton, VIC 3800, Australia.

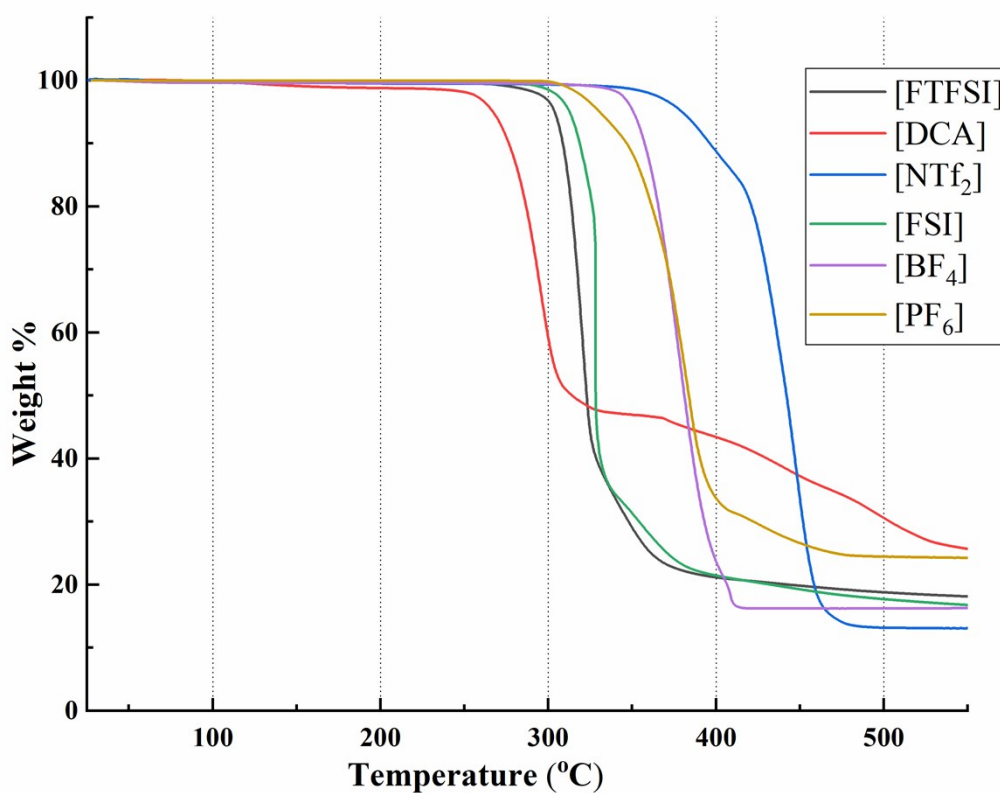

Figure S1. TGA analysis of [C<sub>(13)</sub>mpyr]<sup>+</sup> salts.

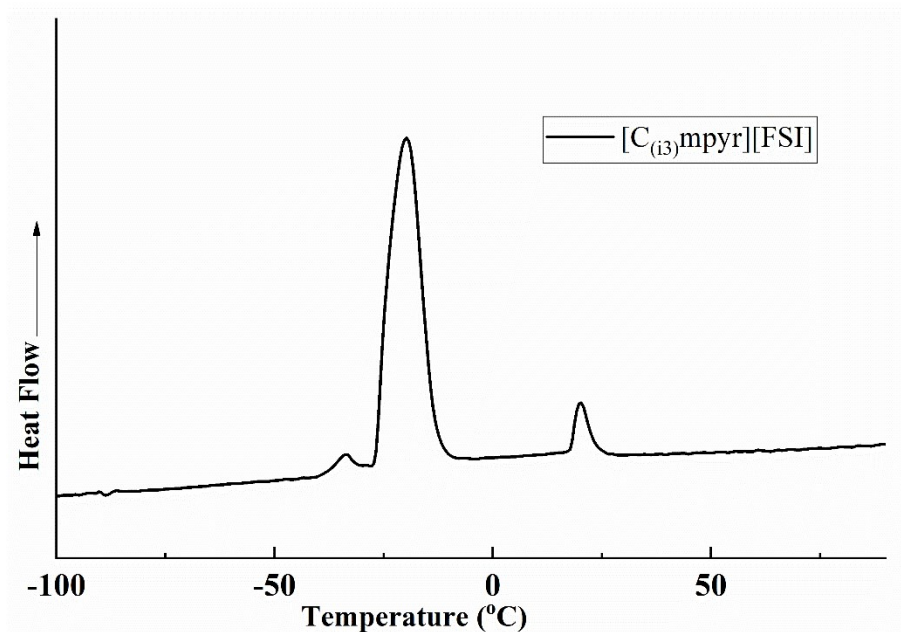

**Figure S2.** DSC of  $[C_{(i3)}\text{mpyr}][\text{FSI}]$  at  $2\text{ }^\circ\text{C}/\text{min}$  from  $-100$  to  $90\text{ }^\circ\text{C}$

**Table S1.** Ionic conductivity, activation energy and viscosity for  $[C_{(i3)}\text{mpyr}]^+$  salts. The activation energies for most of the salts were measured between  $30$  to  $90\text{ }^\circ\text{C}$ , unless stated otherwise.

|                                             | Conductivity/<br>$\text{S cm}^{-1}$ ( $\pm 5\%$ ) at<br>$30\text{ }^\circ\text{C}$ | $E_a/\text{kJ mol}^{-1}$                             | Viscosity<br>(cP) at $30\text{ }^\circ\text{C}$ |
|---------------------------------------------|------------------------------------------------------------------------------------|------------------------------------------------------|-------------------------------------------------|
| $[C_{(i3)}\text{mpyr}][\text{DCA}]$         | $1.1 \times 10^{-2}$                                                               | 18 (Melt)                                            | 40                                              |
| $[C_{(i3)}\text{mpyr}][\text{FTFSI}]$       | $4.9 \times 10^{-3}$                                                               | 20 (Melt)                                            | 34                                              |
| $[C_{(i3)}\text{mpyr}][\text{FSI}]$         | $1.7 \times 10^{-6}$                                                               | 35 (phase I) (30<br>to $80\text{ }^\circ\text{C}$ )  | -                                               |
| $[C_{(i3)}\text{mpyr}][\text{BF}_4]$        | $2.6 \times 10^{-9}$                                                               | 60 (phase I)                                         | -                                               |
| $[C_{(i3)}\text{mpyr}][\text{PF}_6]$        | $2.9 \times 10^{-10}$                                                              | 45 (phase I) (90<br>to $120\text{ }^\circ\text{C}$ ) | -                                               |
| $[C_{(i3)}\text{mpyr}][\text{NTf}_2]$       | $8.0 \times 10^{-10}$                                                              | 40 (phase I) (30<br>to $80\text{ }^\circ\text{C}$ )  | -                                               |
| $[C_2\text{epyr}][\text{FSI}]$ <sup>1</sup> | $1.9 \times 10^{-5}$                                                               | -                                                    | -                                               |

#### References

1. R. Yunis, T. W. Newbegin, A. F. Hollenkamp and J. M. Pringle, *Materials Chemistry Frontiers*, 2018, **2**, 1207-1214.
