# Supplementary figures and images for: The influence of alkyl chain branching on the properties of pyrrolidinium-based ionic electrolytes
Source: Royal Society of Chemistry journal article supplement (doi:10.1039/d0cp03046e), 2020-01-01

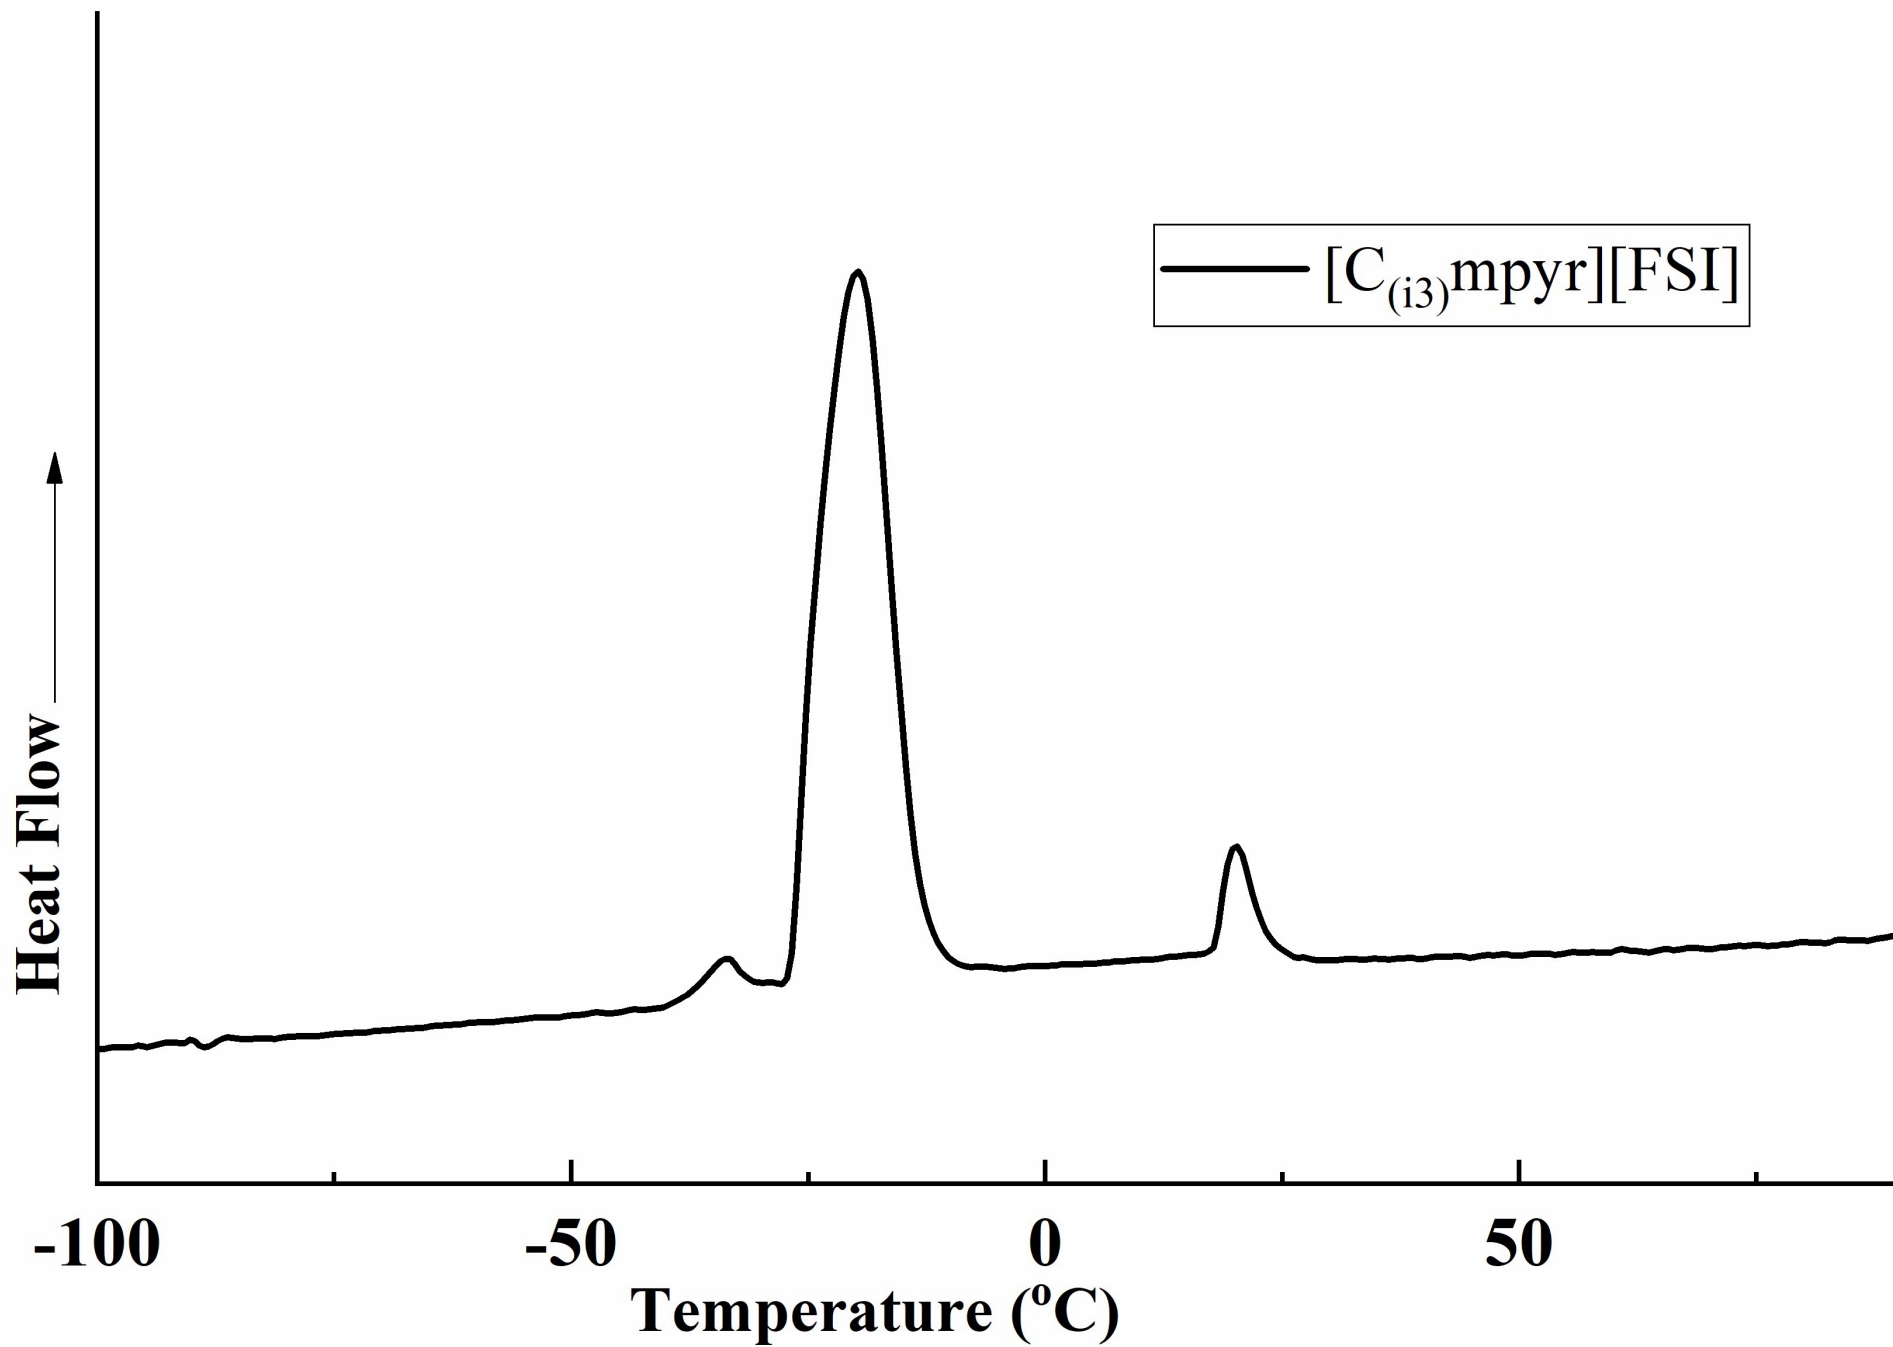

Supplement: d0cp03046e2.pdf [file d0cp03046e2.pdf]
